# Supplementary material for: Identification, distribution and molecular evolution of the pacifastin gene family in Metazoa
Source: PubMed Central journal article supplement (PMC2689174; doi:10.1186/1471-2148-9-97), 2009-05-12
Supplement: 1471-2148-9-97-S1.pdf [file 1471-2148-9-97-S1.pdf]

| (Sub)phylum | Order                                    | Database                                                                                                                                                                                                                                                                                                                                                                                                                                                                                                                                                                                                                                                                                                                   |
|-------------|------------------------------------------|----------------------------------------------------------------------------------------------------------------------------------------------------------------------------------------------------------------------------------------------------------------------------------------------------------------------------------------------------------------------------------------------------------------------------------------------------------------------------------------------------------------------------------------------------------------------------------------------------------------------------------------------------------------------------------------------------------------------------|
| Hexapoda    | Hymenoptera                              | <ul style="list-style-type: none"> <li>• <a href="http://www.hgsc.bcm.tmc.edu/projects/honeybee">http://www.hgsc.bcm.tmc.edu/projects/honeybee</a></li> <li>• <a href="http://racerx00.tamu.edu/blast/blast.html">http://racerx00.tamu.edu/blast/blast.html</a></li> </ul>                                                                                                                                                                                                                                                                                                                                                                                                                                                 |
|             | Diptera                                  | <ul style="list-style-type: none"> <li>• <a href="http://www.ensembl.org">http://www.ensembl.org</a></li> <li>• <a href="http://flybase.bio.indiana.org">http://flybase.bio.indiana.org</a></li> <li>• <a href="http://www.vectorbase.org">http://www.vectorbase.org</a></li> <li>• <a href="http://www.genedb.org">http://www.genedb.org</a></li> </ul>                                                                                                                                                                                                                                                                                                                                                                   |
|             | Lepidoptera                              | <ul style="list-style-type: none"> <li>• <a href="http://210.249.76.231/cgi-bin/lib_ptoc_MX">http://210.249.76.231/cgi-bin/lib_ptoc_MX</a></li> <li>• <a href="http://papilio.ab.a.u-tokyo.ac.jp/Bombyx_EST/">http://papilio.ab.a.u-tokyo.ac.jp/Bombyx_EST/</a></li> <li>• <a href="http://heliconius.cap.ed.ac.uk/butterfly/db/">http://heliconius.cap.ed.ac.uk/butterfly/db/</a></li> <li>• <a href="http://morus.ab.a.u-tokyo.ac.jp/cgi-bin/index.cgi">http://morus.ab.a.u-tokyo.ac.jp/cgi-bin/index.cgi</a></li> <li>• <a href="http://sgp.dna.affrc.go.jp/KAIKObase/">http://sgp.dna.affrc.go.jp/KAIKObase/</a></li> <li>• <a href="http://silkworm.genomics.org.cn/">http://silkworm.genomics.org.cn/</a></li> </ul> |
|             | Coleoptera                               | <ul style="list-style-type: none"> <li>• <a href="http://beetlebase.org/">http://beetlebase.org/</a></li> </ul>                                                                                                                                                                                                                                                                                                                                                                                                                                                                                                                                                                                                            |
|             | Hemiptera                                | <ul style="list-style-type: none"> <li>• <a href="http://urgi.versailles.inra.fr/projects/Aphid">http://urgi.versailles.inra.fr/projects/Aphid</a></li> </ul>                                                                                                                                                                                                                                                                                                                                                                                                                                                                                                                                                              |
| Crustacea   | Branchiopoda<br>Copepoda<br>Malacostraca | <ul style="list-style-type: none"> <li>• <a href="http://iubio.bio.indiana.edu:7182/blast/">http://iubio.bio.indiana.edu:7182/blast/</a></li> </ul>                                                                                                                                                                                                                                                                                                                                                                                                                                                                                                                                                                        |
| Nematoda    |                                          | <ul style="list-style-type: none"> <li>• <a href="http://www.wormbase.org/">http://www.wormbase.org/</a></li> <li>• <a href="http://www.nematode.net/">http://www.nematode.net/</a></li> </ul>                                                                                                                                                                                                                                                                                                                                                                                                                                                                                                                             |
