# Supplementary material for: Identification, distribution and molecular evolution of the pacifastin gene family in Metazoa
Source: PubMed Central journal article supplement (PMC2689174; doi:10.1186/1471-2148-9-97), 2009-05-12
Supplement: 1471-2148-9-97-S4.pdf [file 1471-2148-9-97-S4.pdf]

## Placozoa - Metazoa

### Trichoplax adhaerens

>TAPD-1  
CKFNNINYQVGENRKAEDG<sup>C</sup>NT<sup>C</sup>MCLKNGGWG<sup>C</sup>TRMAC<sup>C</sup>

>TAPD-2  
CIFEEKLFRLGETVKQK<sup>C</sup>NQ<sup>C</sup>CK<sup>C</sup>LGQNKWAC<sup>C</sup>TR<sup>C</sup>IAC<sup>C</sup>

>TAPD-3  
CVHNTMLLKQNETKRRK<sup>C</sup>NT<sup>C</sup>CK<sup>C</sup>CLG<sup>C</sup>SNRWAC<sup>C</sup>TR<sup>C</sup>MFC<sup>C</sup>

>TAPD-4  
CIFEGKMRKEETRADD<sup>C</sup>NI<sup>C</sup>CR<sup>C</sup>CFGNNRWG<sup>C</sup>TR<sup>C</sup>KAC<sup>C</sup>

>TAPD-5  
CNYGRRFRFTGDYVARG<sup>C</sup>NV<sup>C</sup>CR<sup>C</sup>CTPTGKFM<sup>C</sup>TR<sup>C</sup>ND<sup>C</sup>

>TAPD-6  
CILNDREYNISAVTKID<sup>C</sup>NY<sup>C</sup>CR<sup>C</sup>CLKGIWAC<sup>C</sup>TR<sup>C</sup>MAC<sup>C</sup>

>TAPD-7  
CEKDGRFFVVRGELRREK<sup>C</sup>NL<sup>C</sup>CR<sup>C</sup>SNSGRWM<sup>C</sup>CT<sup>C</sup>KMC<sup>C</sup>

>TAPD-8  
CQHKTRTFHGEIRKDQ<sup>C</sup>NF<sup>C</sup>CN<sup>C</sup>TRNETWAC<sup>C</sup>SN<sup>C</sup>YS<sup>C</sup>C<sup>C</sup>

>TAPD-9  
CVHRGRRFNIGHIKKQ<sup>C</sup>SC<sup>C</sup>NT<sup>C</sup>CK<sup>C</sup>CLTNGGWG<sup>C</sup>TR<sup>C</sup>MMC<sup>C</sup>

>TAPD-10  
CQMGNEVSRVGETKFLD<sup>C</sup>NK<sup>C</sup>CT<sup>C</sup>SSTGKWM<sup>C</sup>TE<sup>C</sup>KV<sup>C</sup>C<sup>C</sup>

>TAPD-11  
CKFNNQYFQKGEQIRNS<sup>C</sup>NL<sup>C</sup>CK<sup>C</sup>GYTGQWAC<sup>C</sup>TR<sup>C</sup>MMC<sup>C</sup>

>TAPD-12  
CTYQNTTLYLGEVRKF<sup>C</sup>NS<sup>C</sup>YS<sup>C</sup>CS<sup>C</sup>CRGNETVE<sup>C</sup>CMEL<sup>C</sup>PC<sup>C</sup>

>TAPD-13  
CYHMGTTYPTGFI<sup>C</sup>AKK<sup>C</sup>DS<sup>C</sup>NK<sup>C</sup>CK<sup>C</sup>CNKYGLWAC<sup>C</sup>TAF<sup>C</sup>K<sup>C</sup>C<sup>C</sup>

>TAPD-14  
CTHNNEIYRPSEIRMD<sup>C</sup>DN<sup>C</sup>RC<sup>C</sup>MCLKDGAWG<sup>C</sup>TR<sup>C</sup>MMC<sup>C</sup>

>TAPD-15  
CTFRGRTFAAGTIKKQ<sup>C</sup>GN<sup>C</sup>MCK<sup>C</sup>CYTNGEWN<sup>C</sup>CT<sup>C</sup>TK<sup>C</sup>PC<sup>C</sup>

>TAPD-16  
CEMRGMFLFHGETIRK<sup>C</sup>NL<sup>C</sup>CT<sup>C</sup>CLPTGNMAC<sup>C</sup>TAK<sup>C</sup>DC<sup>C</sup>

>TAPD-17  
CKHGKRLFYEGERSKQ<sup>C</sup>DN<sup>C</sup>EC<sup>C</sup>Q<sup>C</sup>LSNGSWN<sup>C</sup>CT<sup>C</sup>QNT<sup>C</sup>C<sup>C</sup>

>TAPD-18  
CRMDRTFEVGHMRHR<sup>C</sup>CR<sup>C</sup>RC<sup>C</sup>MEGGFWG<sup>C</sup>CR<sup>C</sup>HR<sup>C</sup>PC<sup>C</sup>

>TAPD-19  
CRHSGLKFNHGENRSL<sup>C</sup>DN<sup>C</sup>TC<sup>C</sup>IC<sup>C</sup>NNGSWAC<sup>C</sup>TMK<sup>C</sup>MC<sup>C</sup>

>TAPD-20  
CVHNNEYYSHRETRKQ<sup>C</sup>DN<sup>C</sup>TC<sup>C</sup>MCTNGKWAC<sup>C</sup>TR<sup>C</sup>MMC<sup>C</sup>

>TAPD-21  
CFHENETFQHGATR<sup>C</sup>KQ<sup>C</sup>DN<sup>C</sup>TC<sup>C</sup>CK<sup>C</sup>IDGRWG<sup>C</sup>TR<sup>C</sup>MMC<sup>C</sup>

>TAPD-22  
CQYKDEM<sup>C</sup>FQ<sup>C</sup>QGEIT<sup>C</sup>KQ<sup>C</sup>DN<sup>C</sup>TC<sup>C</sup>CK<sup>C</sup>IKGRWAC<sup>C</sup>TR<sup>C</sup>ML<sup>C</sup>C<sup>C</sup>

>TAPD-23  
CEYEDTIYEHNETR<sup>C</sup>KQ<sup>C</sup>DN<sup>C</sup>TC<sup>C</sup>CK<sup>C</sup>ITGKWAC<sup>C</sup>TR<sup>C</sup>MMC<sup>C</sup>

>TAPD-24  
CTFRDTLYEHGETR<sup>C</sup>KQ<sup>C</sup>DN<sup>C</sup>TC<sup>C</sup>CK<sup>C</sup>ITGKWAC<sup>C</sup>TR<sup>C</sup>MMC<sup>C</sup>

>TAPD-25  
CQYKDTTFAHGETT<sup>C</sup>KQ<sup>C</sup>DN<sup>C</sup>TC<sup>C</sup>CK<sup>C</sup>IKGRWAC<sup>C</sup>TR<sup>C</sup>ML<sup>C</sup>C<sup>C</sup>

>TAPD-26  
CEYEDTIYEHNETR<sup>C</sup>KQ<sup>C</sup>DN<sup>C</sup>TC<sup>C</sup>CK<sup>C</sup>ITGKWAC<sup>C</sup>TR<sup>C</sup>MMC<sup>C</sup>

>TAPD-27  
CTFRDTLYEHGETR<sup>C</sup>KQ<sup>C</sup>DN<sup>C</sup>TC<sup>C</sup>CK<sup>C</sup>ITGKWAC<sup>C</sup>TR<sup>C</sup>MMC<sup>C</sup>

>TAPD-28  
CQYKDTTFAHGETT<sup>C</sup>KQ<sup>C</sup>DN<sup>C</sup>TC<sup>C</sup>CK<sup>C</sup>IKGRWAC<sup>C</sup>TR<sup>C</sup>ML<sup>C</sup>C<sup>C</sup>

>TAPD-29

CEYEDTIYEHNETRKQDCNTCKCITGKWACTRMMC  
>TAPD-30  
CTYRDTLYEHGETRKQDCNTCKCITGKWACTRMMC  
>TAPD-31  
CQYKDTTFAHGETTKQDCNTCKCIKGRWACTRMLC  
>TAPD-32  
CEYEDTIYEHNETRKQDCNTCKCITGKWACTRMMC  
>TAPD-33  
CTYRDTLYEHGETRKQDCNTCKCITGKWACTRMMC  
>TAPD-34  
CQYKDTTFAHGETTKQDCNTCKCIKGRWACTRMLCV  
>TAPD-35  
CEYEDTIYEHNETRKQDCNTCKCITGKWACTRMMC  
>TAPD-36  
CQYKDTTFAHGETTKQDCNTCKCIKGRWACTRMLC  
>TAPD-37  
CEYEDTIYEHNETRKQDCNTCKCITGKWACTRMMC  
>TAPD-38  
CTYRDTLYEHGETRKQDCNTCKCITGKWACTRMMC  
>TAPD-39  
CVYEKKNYNITAVVEKDCQRCICGLFARWYCQRKPNC  
>TAPD-40  
CALGSQQVPTGYKMEEKCROCTCMNDGQWKCNVNSC  
>TAPD-41  
CTLTNGQIIPHGHVEEKKCEKCKCNDGKYVCTNKPC  
>TAPD-42  
CEYQNKKFPVNTVKLIGLCHRCKCSPAGNWRCLDLGC

## Onychophora - Metazoa

---

### Epiperipatus sp. - Peripatidae - Onychophora - Metazoa

>ESPD-1  
CEPGTTYKNDCHCNADGTAGPCTLMFC  
>ESPD-2  
CEPNTSFKRDCNSCHCNADGTVAACLMTTC  
>ESPD-3  
CYPGALTFDDEFNRCFCFTKNGLLACTLMYC

## Crustacea - Arthropoda - Metazoa

---

### Calanus finmarchicus - Calanidae - Calanoida - Maxillipoda - Crustacea

>CFPD-1  
CGLVNGEKEYVGDWADDCKNCICRETGIATCTKRFC  
>CFPD-2  
CGLLNGEERNVGDWADDCKNCICRETGIATCTKRFC  
>CFPD-3  
CGENERGVLRQPGDSWQEDCNRCRCLAAGVPGCTKKFC

### Gammarus pulex - Gammaridae - Peracarida - Malacostraca - Crustacea

>GPPD-1  
CRPGSRFRQKCNWCTCSSQGLKLSKMKC  
>GPPD-2  
CEGDAMFKDEENCNWCCHNGVAACTLRLC  
>GPPD-3  
CVEGTSWLDECNRCRTNGLKICTRRMC

### Litopenaeus vannamei - Penaeidae - Decapoda - Malacostraca - Crustacea

>LVPD-1  
CAPGSRWKDDCNTCTCSDTGISACTLMAC

>LVPD-2  
DEGSRWKIDENWCKIRGSPACSSRPC  
>LVPD-3  
CKPGSAWKPDNWCCTQDGMASCNLRAC  
>LVPD-4  
ENGSKWKLDNNTCVVDERARCTRKAC

**Homarus americanus - Nephropidae- Decapoda - Malacostraca -Crustacea**

>HAPD-1  
VPGSRWKNDNWCSTETGIGMCTLMAC  
>HAPD-2  
EGDARWKFDHCNWCSCVNGTGVCSKKIC  
>HAPD-3  
CKGDPNTSRWRVECNWCRCISGYGVCTRKGC  
>HAPD-4  
EGTPEWKKDCNNTCNVSGRAVCTTKYC

**Carcinus maenas - Portunidae - Decapoda - Malacostraca -Crustacea**

>CMPD-1  
EGQSRNDRWRKDCNWCSCRDGKARCSRRLC  
>CMPD-2  
EGNPAWKDDNSCRCVDGRAVCTSKFC  
>CMPD-3  
ENGSRWRVECNWCSCQGKSHCTEAAAC  
>CMPD-4  
HGASRWKDCNWCSCVNGRGRCTRKGC  
>CMPD-5  
VPGSRWLVDNWCSCADNGLYSACTLMAC

**Petrolisthes cinctipes - Porcellanidae - Decapoda - Malacostraca -Crustacea**

>PCPD-1  
VPGTSWKQDCNNTCFCETETGVGVCTLKLC  
>PCPD-2  
ERGSTWMDDCNRCRANGVGVCTKKAC  
>PCPD-3  
QGEEGRWREACNWCRCVEGKGVCTRRGC  
>PCPD-4  
EGTASWKDNCNNTCHCS DGRAVCTAKLC

**Pacifastacus leniusculus - Astacidae - Decapoda - Malacostraca -Crustacea**

>PLPD-1  
APGSRWKNECNWCSCADHGLALCTLMGC  
>PLPD-2  
SEGSRWKADDNWCRCIDGSPSCTKRRLC  
>PLPD-3  
YGD PDTNRWRIECNWCRCVNGKGSCTRKGC  
>PLPD-4  
EGTPTWTKGCNNTCSCVNGSAQCTTEEC  
>PLPD-5  
VPGSRWKDCNWCSTETAIGMCTLIGC  
>PLPD-6  
TDGSKWKDDCNWCCTNNGSASCTEKLC  
>PLPD-7  
VPGSRWKDECNWCWCEANGAAPCTRMGC  
>PLPD-8  
IDGSRWKVDCNWCCTNNGSSACTEKLC  
>PLPD-9  
TEGESWRQDCNMCSSTGLRISVKGC

**Ellipura - Arthropoda - Metazoa**

---

**Folsomia candida - Isotomidae - Collembola -Ellipura**

>FCPD-1  
CIDGRTKPVDCNQCVCAIGKWACTKMSC  
>FCPD-2  
CMEGEAKPIGCNQCVCHMNSWACSDFTC  
>FCPD-3  
CQTEEDVKSKDCNICSRRGVWVCTENDC

**Insecta - Arthropoda - Metazoa**

---

**Orthoptera**

---

**Gryllus bimaculatus - Gryllacrididae - Orthoptera**

>GBPD-1  
CVPGTTWKLDNCNTCHCTDSGISICTALGC

**Schistocerca gregaria - Acrididae - Orthoptera**

>SGPI-1  
CTPGQTKKQDCNTCNCTPTGVWACTRKG  
>SGPI-2  
CEPGTTFKDKCNTCRCGSDGKSAACTLKAC  
>SGPI-3  
CTPGSRKYDGCNWCTCSSGGAWICTLKYC  
>SGPI-4A  
CTPGETKKLDCNTCFCSDSGIWCTLMGC  
>SGPI-4B  
CTPNTTFKKDCNTCSNDRGTAAVCTLKAC  
>SGPI-4Ca  
CTPGATYKEGCNTCRCRSDGKSGACTRKIC  
>SGPI-4Cp  
CTPGATYKEGCNTCRCRSDGKSGACTRKIC  
>SGPI-5A  
CTPGDTKKEDCNTCRCTPTGVWVCTRKGCV  
>SGPI-5Ba  
CTPGATFKNKCNTCRCGNGRSASCTLMAC  
>SGPI-5Bt  
CTPGTTFKKNCNTCRCGNGRSASCTLMAC  
>SGPI-6  
CTPGEKKKEDCNTCTCTATGVWACTRRGC  
>SGPI-7  
CTPNSTFKKDCNTCTCNSSGTSIAICTQLGC  
>SGPI-8  
CTPGTTFKDKCNTCRCSSNGRSAACTLKAC

**Locusta migratoria - Acrididae - Orthoptera**

>LMPI-1  
CTPGQVKQDCNTCTCTPTGVWGCTRKG  
>LMPI-2  
CEPGKTFKDKCNTCRCGADGKSAACTLKAC  
>LMPI-3  
CTPGQTKKQDCNTCTCTPTGIWGCTRKAC  
>LMPI-4  
CTPNKSFKKDCNTCTCNKDGTAAICTQIAC  
>LMPI-5  
CTPGTTFQDRCNTCRCSSNGRSAACTLKAC  
>LMPI-6  
CTPGETKKLDCNTCFCTKAGIWCTLMAC  
>LMPI-7  
CTPGTTFKKDCNTCSGNDGTAAVCTLKAC

>LMPI-8  
CTPNTTFQKDCNTCTCNKDGTAAVCTLKAC  
>LMPI-9  
CTPGATYKEDCNI<sup>1</sup>CR<sup>2</sup>CRSDGKSGACTKKSC

## Blattaria

---

### Blatella germanica - Blattellinae - Blattaria

>BGPD-1  
CVPNSTFRQDCNTCH<sup>1</sup>CSADGKTA<sup>2</sup>ACTQKGC  
>BGPD-2  
CTPGSTFKRDCNTCR<sup>1</sup>CSNDGT<sup>2</sup>TAACTLKAC  
>BGPD-3  
CVPGSTFKQDCNTCT<sup>1</sup>CSADGR<sup>2</sup>SAACTLKLC  
>BGPD-4  
CTPGTTFKRDCNTCR<sup>1</sup>CSADGQ<sup>2</sup>SAACTLKSC

## Isoptera

---

### Hodotermopsis sjoestedti - Termopsinae - Isoptera

>HSPD-1  
CEPGSVFKKDCNTCR<sup>1</sup>CSDN<sup>2</sup>GHAAACTRNIC  
>HSPD-2  
CIPGTNWKQDCNTCS<sup>1</sup>CTSS<sup>2</sup>SGVPACTLKAC  
>HSPD-3  
CTPGTNWKQDCNTCS<sup>1</sup>CTSS<sup>2</sup>SGVPACTLKAC  
>HSPD-4  
CEPGSVFKKDCNTCT<sup>1</sup>CSADGR<sup>2</sup>SAACTEKAC  
>HSPD-5  
CVPGTTYKKDCNTCR<sup>1</sup>CSADGQ<sup>2</sup>SEACTLKFC

## Coleoptera

---

### Tribolium castaneum - Tenebrionidae - Coleoptera

>TCPD-1  
CKPGETFKRDCNSCT<sup>1</sup>CTLDGK<sup>2</sup>NAVCTLKSC  
>TCPD-2  
CKPGETFKRDCNSCT<sup>1</sup>CTLDGK<sup>2</sup>NAVCTLKSC  
>TCPD-3  
CQPGTTFKKDCNTCV<sup>1</sup>CNKD<sup>2</sup>GTNAACTLKAC  
>TCPD-4  
CKVGD<sup>1</sup>TKFKDCNF<sup>2</sup>CKCTNGAF<sup>3</sup>ECTEKKC  
>TCPD-5  
CTPGQTFKKDCNTCT<sup>1</sup>CTPD<sup>2</sup>GKNAVCTLKKC  
>TCPD-6  
CAPNDYFKID<sup>1</sup>NTCY<sup>2</sup>NI<sup>3</sup>EKTGYLCTENLC

### Dascillus cervinus - Hydrophiloidae - Coleoptera

>DCPD-1  
CTPGTTWKND<sup>1</sup>NTCS<sup>2</sup>CGP<sup>3</sup>NGAPFCTFKAC  
> DCPD-2  
CEPGTTWKQDCNSCS<sup>1</sup>CLNG<sup>2</sup>SPVCTLKAC  
>DCPD-3  
CSQGEQKNDD<sup>1</sup>NTCR<sup>2</sup>CSQ<sup>3</sup>QWACTKKKC  
>DCPD-4  
CSQGQTKNED<sup>1</sup>NTCR<sup>2</sup>CANG<sup>3</sup>KWACTKKKC  
>DCPD-5  
CSQGQTKNDG<sup>1</sup>NTCR<sup>2</sup>CVQ<sup>3</sup>QWACTRKKC

**Georissus sp. - Colymbetinae - Coleoptera**

>GSPD-1  
CEQNGLTGKDDCINNCRVVDNKWACSRKLC  
>GSPD-2  
CTPGSVVKRDCNTCTCTPDGRIGACTLRAC

**Meladema coriacea - Colymbetinae - Coleoptera**

>MCPD-1  
CTPGKSFLNSDGCNTCTCAKDGVNAYCTLMAC  
>MCPD-2  
CEPGTIIQRDCNSCNVPGIGYACTKRAC

**Cicindela campestris - Cicindelidae - Coleoptera**

>CCPD-1  
CSPGQTKMQDCNSCRCVNGGWACTRKAC

**Pyrocoelia rufa - Lampyridae - Coleoptera**

>PRPD-1  
CAPLSSFKIDCDDCQCSQSEDGTQYSCQVGVC

**Diabrotica virgifera virgifera - Chrysomelidae - Coleoptera**

>DVPD-1  
CPPLVKFRKGCNICICSPNGYDYTCTQNKAC

**Mecoptera**

---

**Panorpa vulgaris - Panorpidae**

>PVPD-1  
CEPNTITKYECONDRCRCAKDGSGYMCTRQVC  
>PVPD-2  
CQPGSKTKYECONDCTCDQSGTSYMCTRRC  
>PVPD-3  
CEPNSQTRYECNSCRCTADGSGYQCTRRAC  
>PVPD-4  
CTPGSHFKHQCONDCTCMANGQFAACTLKAC

**Siphonaptera**

---

**Ctenocephalides felis - Pulicidae**

>CFPD-1  
CTPGETKQEDCNECICAKADGTGYQCTEREC  
>CFPD-2  
CEPGSTKKEDCNTCTCTPDGKNYMCTLMMC  
>CFPD-3  
PGQETRLDCNTCKCASDGTGYFCTRQAC  
>CFPD-4  
CTPGKTKQIDCNTCTXARDXSGYACTRKMCC  
>CFDP-5  
CKAGEQRQVDCNTCTCAADGTGYQCTRQAC

**Diptera**

---

**Culex quinquefasciatus - Culicidae - Diptera**

>CPPD-1  
-----MVECNKCRCS SDGKLMSC TRKFC  
>CPPD-2  
CTPNETKQEDCNRCKCAANGIGWFCTRKAC  
>CPPD-3  
CTPGTSFKSSDGCNDCFCCTETGIAACTMKFC

>CQPD-4  
CEPGSSFKSADGCNDCFCCTETGIAACTMKFC  
>CQPD-5  
CVKGTSFRSSDDCNTCFCGENGVIACRKF  
>CQPD-6  
CVPGSTFKDAEGCNDCTADGRAACTEKL  
>CQPD-7  
CEPGTSFKSADGCNCFCTENGIAACTQKFC  
>CQPD-8  
CKPGTSFKHSDGCNNCYCGENGIAACTQMFC  
>CQPD-9  
CKPNSRFKYQCNCRCNDNTGKFAACTYKFC

**Armigeres subalbatus - Culicidae - Diptera**

>ASPI-1  
CTPNEVKMEDCNRCCKAANGIGWFCTRKAC  
>ASPI-2  
CVPGTSFKAADGCNCFGPNGIAA-CTQMFC  
>ASPI-3  
CVPGTSYKSADGCNCFCTENGIAA-CTLKFC  
>ASPI-4  
CVPGTSYKSADGCNCFCTENGIAA-CTXKFC  
>ASPI-5  
CVPGTSFKSADGCNCFCSDNIAA-CTLKFC  
>ASPI-6  
CEPGTTFRDADDNCNCFCTDDGVAA-CTEKFC  
>ASPI-7  
CNPGKSFKFQCNTCRCDTSGQTAACFTKFC  
>ASPI-8  
CAPGSTFKLECNTCRCSADGKLMSCTRKFCPLPDEQSD

**Aedes aegypti - Culicidae - Diptera**

>AAPD-1  
CEPGSTFKLDNCRGADGKVMSCTRKFC  
>AAPD-2  
CTPNEVKMEDCNRCCKAANGIGWFCTRKAC  
>AAPD-3  
CEPGTNFKSADGCNCFCTATGIAACTQKFC  
>AAPD-4  
CVPGSTFRSADDNCFCTETGIAACTQKFC  
>AAPD-5  
CVPGTTFKSADGCNCFSESGHAACTMKFC  
>AAPD-6  
CVPGTSFKSADGCNCFCSANGMAACTLRFC  
>AAPD-7  
CSPGKSFKYQCNTCRCDTSGQTAACFTKFC

**Anopheles gambiae - Culicidae - Diptera**

>AGPD-1  
CEPGTTFMEDCNKCRGPDGQKACTRKMFC  
>AGPD-2  
CSPNEIKMKDCNRCANNGIGWFCTRAC  
>AGPD-3  
CTPGTTFRSDDGNCFCTETGHAAC TLKAC  
>AGPD-4  
CTPRSSFYQCNTCLCSDDGKMAGCTFKFC

**Belgica antarctica - Chironomidae - Diptera**

>BAPD-1  
CENGESYFDGNCTCKNGAYSCTLKAC  
>BAPD-2

CDKGQSYFDGCNTCVCGNGVYACTLKAC  
>BAPD-3  
CDKGASYNDGCNTCTCSNGNYS

**Phlebotomus papatasi - Psychododae - Diptera**

>PPPD-1  
CVPGSSFMDKDNCRVCCTKDGARYACTKRFC  
>PPPD-2  
CVPGSRFKSSDGCNWCCTCSEDGKHSFCTLMAC  
>PPPD-3  
CVPKSSFTAPDGCNTCRCSDDGKHSFCTRMEC  
>PPPD-4  
CTPGQFTASDGCNTCHCNEEGTNAVCTLKAC  
>PPPD-5  
CTPKSTFTAPDGCNTCRCSDDGKTSFCTRMEC

**Lutzomyia longipalpis - Psychododae - Diptera**

>LLPD-1  
CVPRSTFMDKEGCNRCCTCTNDGARYACTKKFC  
>LLPD-2  
CTPGSTFKAADGCNTCRCSDDGKNSMCTLMAC  
>LLPD-3  
CVPKSTFTAADGCNTCTCSENGKYAFCTRMEC

**Lepidoptera**

---

**Spodoptera frugiperda - Noctuidae - Lepidoptera**

>SFPD-1  
CLVGSEWESNCHYCRCSDEGVAECLRQDTC  
>SFPD-2  
CKPNTTFQRDCNTCICLENLGLCTLEFC  
>SFPD-3  
CEANRMFIKDCNTCWCNEDGTSYYCTRRVC

**Bombyx mori - Bombycidae - Lepidoptera**

>BMPD-1  
CLAGTEWESNCHFRCRCSDSGVAECLRQDSC  
>BMPD-2  
CQPGTSFQRDCNTCVCLDNLGLCSLDAC  
>BMPD-3  
CAPGSSWSNQNSCRCNAFGYGICSDEAC  
>BMPD-4  
CAPKTMWKNECNTCWCCTSDGKPMCTRMEC  
>BMPD-5  
CAPGSTWSNQNSCRCNADGYAICSDEAC  
>BMPD-6  
CVPNTTWKNECYTCWCCTSDGKPMCTRVEC  
>BMPD-7  
CAPGSTWSNQNSCRCNADGYAICSDEAC  
>BMPD-8  
CAPKTMWKNECNTCWCCTSDGKPMCTKMGC  
>BMPD-9  
CVANRMFIKDCNTCWCNEDGTTYCTRRVC  
>BMPD-10  
CKPNETFQIGCNRCRCSNSEGTLYSCTRVGC  
>BMPD-11  
CQFGQEFRLDNKCLCDKEGKDFSCTRMDC  
>BMPD-12  
CVPGSVYNQGCNVCRCTDEGRHATCTLMRC  
>BMPD-13



CNPGEQFTRDCNDCTCSADGKSVFCTLRLC

**Antheraea mylitta - Saturniidae - Lepidoptera**

>AMPD-1

CEPGTHWKEGCNFCYVEAGIPACTTLLC

>AMPD-2

CLPGTTWKSQCNYCLCLGDGYPACTFKEC

>AMPD-3

CAAHTIWRDECIIVCRCTIYGEASCMLAC

**Samia cynthia ricini - Saturniidae - Lepidoptera**

>SCPD-1

CLPRSKWESNCHSCESESAGAAKCVKQKDC

>SCPD-2

CKPNTTFNKGONTCLCLENGLGLCTLQNC

>SCPD-3

CAPGSSWRSQCNDVCNDQGISLCTLALC

>SCPD-4

CAPNTMWKNDONTCRCTTAGKAMCTRIGC

**Heliconius erato - Nymphalidae - Lepidoptera**

>HEPD-1

CLAGSEWESLCHSCLCSEDGQPECARLGSC

>HEPD-2

CKPLTEFRRDNICICIFESGLGSSCTSMEC

>HEPD-3

CKVGTKWQSQCNNCSDDGMPMCTDMAC

>HEPD-4

CALGTSWKLDONTCYCPPTGRAACTRIGC

>HEPD-5

CRPDEVFEVDCNMCRCSVDGMSFSCTRRAC

>HEPD-6

CQFGQEFTMDCNKCLCNNEGQDYSCTRINC

>HEPD-7

CVPGSVFKQGCNTCQCTEDGNHATCTIKRC

HEPD-8

CNPGEQFKRGONDCACSADGKSVFCALRLC

**Danaus plexippus - Nymphalidae - Lepidoptera**

>DPPD-1

CNKCLCDNEGQNFSTRIDC

>DPPD-2

CTPGSVFTQDCNTCRCTEDGGHATCTLKQC

>DPPD-3

CNPGEQFKRDCNDCTCSANGRGVFCTLRIC

>DPPD-4

CSVVAFILCLATFCRGGVIKCTPGSKDETC

>DPPD-5

CSPRTEWKSCKHRICSDSGQALCFKIEGC

>DPPD-6

CKPESKFSRDNSCLCTNNGNVICTLKAC

>DPPD-7

CAANRMFIKDCNTCWCNEDGTSFFCTRKVC

**Manduca sexta - Sphingidae - Lepidoptera**

>MSPD-1

CQPGSEWESNCHSCKCSEAGIAECLKQAAC

>MSPD-2

CKPNTNVAEGLPHLHLSGRRIRLCTLKNC

>MSPD-3

--QETSWMNECHHCWCTSKGYRACTLKGC

>MSPD-4  
FHDPEPQHFLLEEKCYIPLFYSGAAFCPLMEC  
>MSPD-5  
CEPRAEFKSECNVCKCSADGRSFSCTQNEC  
MSPD-6  
CQPNTIFYVACNACQCNNQGTDFACTLKIC

### **Epiphyas postvittana - Tortricidae - Lepidoptera**

>EPPD-1  
NSCTCLENGLGLCTLKNC  
>EPPD-2  
CAPGSEWKSGCNDVCCTPEGLRS CSSAGC  
>EPPD-3  
CALHSLWNKESNTCWCCTSDGRAMCTKIGC

## **Hymenoptera**

---

### **Apis mellifera - Apidae - Hymenoptera**

>AMPD-1  
CVPGKSFFDGCNTCTCTDDGNFICTMTAC

### **Nasonia vitripennis - Pteromalidae - Hymenoptera**

>NVPD-1  
CFPGAVFQDDCNGCICGSDGKATCTNMDC  
>NVPD-2  
CVPGSELIHRCNQCFCTDSGTAMMCFKMGC  
>NVPD-3  
CQADKIFDYNCHQCICDAKGNAMCSGKEC  
>NVPD-4  
CNPGMIFASDCNVCI CSKNGKGVCTTFSC  
>NVPD-5  
CLPGSVFLQDCNACTCSNDGLSAACTDMAC  
>NVPD-6  
CEPSTVFKVYCNCTCGCSSDGSSFSCTRMAC  
>NVPD-7  
CEPRTQFKEYCNCTCGCADDGLSYICTRRMC  
>NVPD-8  
CKPHSNFKDYCNCTCFCCNNDGSEFACTRMSC  
>NVPD-9  
CEPRSHFKDYCNCTCACSEDGTTYGCTMMMC  
>NVPD-10  
CTPGQVFFMSONLCKCSSDGNYAACTFMQC  
>NVPD-11  
CPSKSFYNDCNMVCVGPDDASAAC TMMMC  
>NVPD-12  
CPAGEFFHDKCNVCHCSANGFSAACTLMGC  
>NVPD-13  
CTPGSTFQMD CNSCTCSNDGKTAMCTGIAC  
>NVPD-14  
CTPGSNFHQDCNSCICLKDGQSAMCTGIAC  
>NVPD-15  
CVPKSKFNDYCNCTCGCSDDGSSFICTRRLC  
>NVPD-16  
CKPRHLFKKDCNHCVNAGGETAQCTVLD C  
>NVPD-17  
CVPGKSYFDGCNTCF CSEAHSVQCTRRLC  
>NVPD-18  
CPANQPFWNCNYCTCGPEGKDASCTRMAC  
>NVPD-19  
CPPNESFMDKCN YCRCGPEGKDAACTKMNC  
>NVPD-20

CTPGTYFKTECNTVCVCAKDGSAICTQKQC  
>NVPD-21  
CTPNSFFHINCNRCCQCSKHGIQYECEKNAC  
>NVPD-22  
CEPNQVFQNNCNTCACNKDSTAAACTLKEC

#### **Nasonia Giraulti - Pteromalidae - Hymenoptera**

>NGPD-1  
CVPGKSYSDBGNTCFCSEAHSVQCTRRLC  
>NGPPD-2  
CPANQSFKNWCNYCTCGPEGKDASCTRMAC  
>NGPD-3  
CPPNESFIHKCNYCKCGPEGKDAACKMNC  
>NGPD-4  
CKPKTRFKFYCNTCWCSEEGTTRICTKKYC  
>NGPD-5  
CKPKTRFKFYCNTCWCSEEGTTRICTKKYC

#### **Pimpla hypochondriaca - Ichneumonidae - Hymenoptera**

>PHPD-1  
CEIGSNFKNYCNNCYCFDGVMDHALCTRESC  
>PHPD-2  
CTPGENFKYYCNDCCQLDGLRAHAMCTRMRC  
>PHPD-3  
CAPGASFKYCNSCTCGAEGKVAEAQCTSQEC

#### **Solenopsis invicta - Formicidae - Hymenoptera**

>SIPD-1  
CIPGSSYFDGCNNCFQONDAHTVGCTTNWC

## **Hemiptera**

---

#### **Myzus persicae - Aphididae - Hemiptera**

>MPPD-1  
CDPGELVFGFCNLCLCNSQGIPNQLCARSWC

#### **Acyrtosiphon pisum - Aphididae - Hemiptera**

>APPD-1  
CDPGELVFGFCNLCLCNSQGMPNQLCARSWC

#### **Nilaparvata lugens - Delphacidae - Hemiptera**

>NLPD-1  
CLPGELVWVKCNLCLCNLEGQPNVCAKMWC

#### **Rhodnius prolixus - Reduviidae - Hemiptera**

>RPPD-1  
CKPGSVWKEDCNTCFCCTETGHVGCITLMHC  
>RPPD-2  
CTPGTTWKEDCNTCFCSSSTGQIGITLMAC

#### **Triatoma infestans - Reduviidae - Hemiptera**

>TIPD-1  
CEPNTRFKQECNWCTCSANGEYATCTLLYC  
>TIPD-2  
CGFGGTVPAGDGCNFCFTPLGTIGTCTMRRC

#### **Oncopeltus fasciatus - Lygaeinae - Hemiptera**

>OFPD-1  
CTPGSSWREKCKSCVCSKNGTPSCITRILC

#### **Oncometopia nigricans - Cicadellidae - Hemiptera**

>ONPD-1  
CVPGTTWMDDCNTCHCNVNGLAACRMLC  
>ONPD-2  
CTPGSSWTENCQTCTCSDQGAVTCTGDSC

**Graphocephala atropunctata - Cicadellidae - Hemiptera**

>GAPD-1  
CVPGTTWKNDNCNSCFSETGVAACTLMGC  
>GAPD-2  
CTPGSTWTDNCQSCTCSEEGKASC TGAPC

**Phthiraptera**

---

**Pediculus humanus - Pediculidae - Phthiraptera**

>FGPD-1  
CEPGQSFKECNTCTCPDSGLKSLAGCTLKLC  
>PHPD-2  
CEPGSTFKMECNSCKCTDDGTD MVCTKKLC  
>PHPD-3  
CTPGETFKKLCNDCTCPPTGHKSAATCTLLTC
